# Supplementary material
Source: publisher figshare collection journal article supplement (https://frontiersin.figshare.com/ndownloader/files/29049198)
Supplement: Supplementary file [file 29049198]

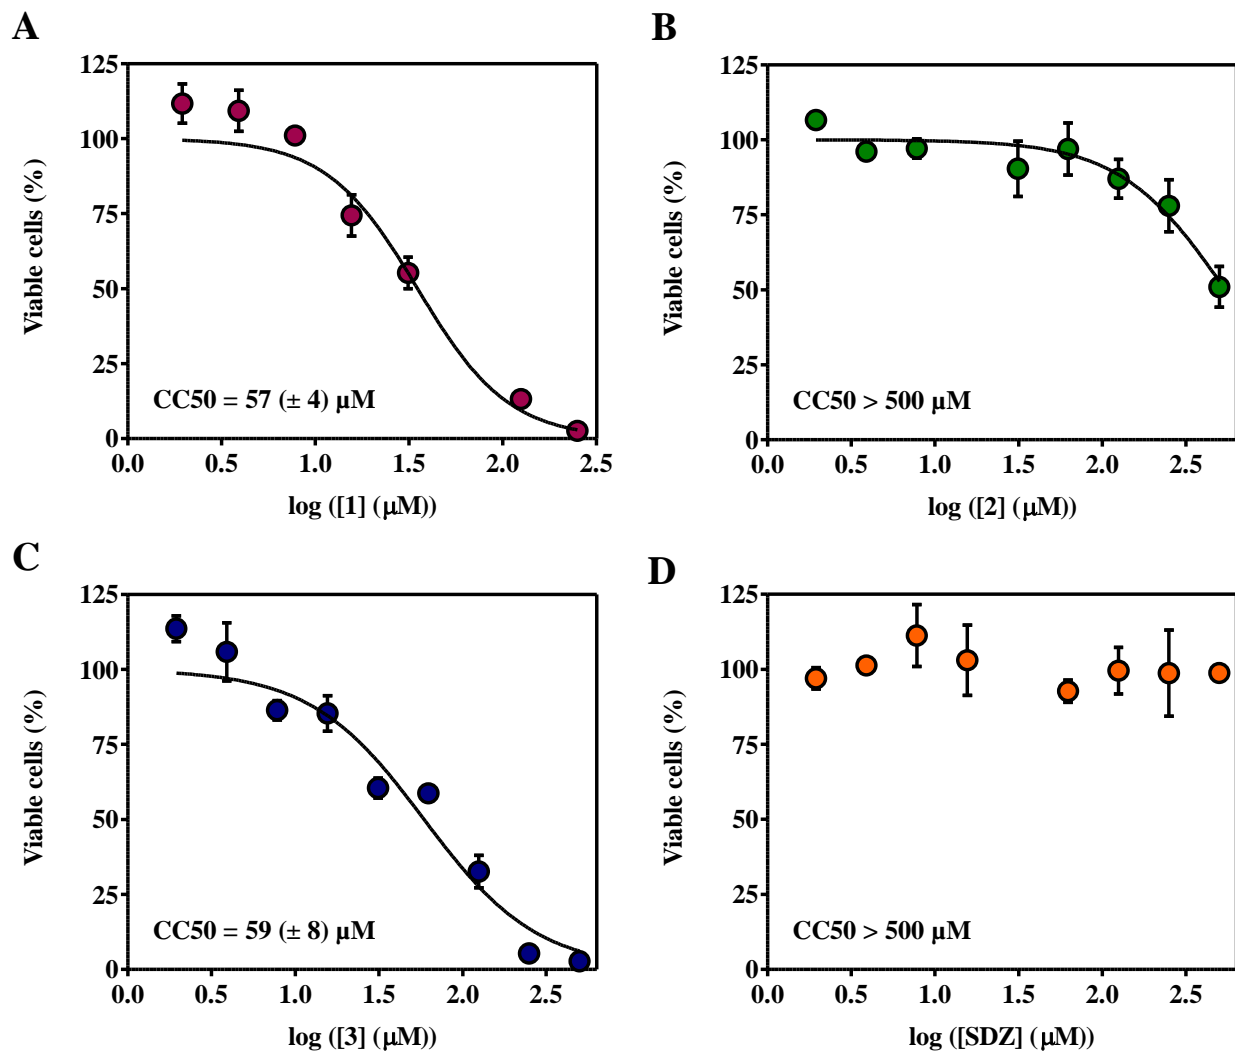

**Supplementary Figure 1. Cytotoxicity of compounds 1 - 3 and SDZ on Vero cells.** Metabolic activity of Vero cells was determined by MTT assay after 2 days of treatment with several concentrations of (A) 1, (B) 2, (C) 3 or (D) SDZ. CC50 values were obtained by non-linear regression analysis of data from three independent experiments (performed in triplicates).
